# Supplementary material for: An Electrochemical Aptasensor for Pb2+ Detection Based on Metal–Organic-Framework-Derived Hybrid Carbon
Source: MDPI journal article supplement (doi:10.3390/bios11010001), 2020-12-22
Supplement: s1 [file s1]

# An Electrochemical Aptasensor for Pb<sup>2+</sup> Detection Based on Metal–Organic-Framework-Derived Hybrid Carbon

Jina Ding <sup>1,2</sup>, Dongwei Zhang <sup>1,2</sup>, Yang Liu <sup>1,2</sup>, Xuejia Zhan <sup>1,2</sup>, Yitong Lu <sup>1,2</sup>, Pei Zhou <sup>1,2\*</sup> and Dan Zhang <sup>1,2</sup>

<sup>1</sup> School of Agriculture and Biology, Shanghai Jiaotong University, Shanghai 200240, China; jnding@sjtu.edu.cn (J.D.); Donaghy-Zhang@sjtu.edu.cn (D.Z.); Kimi1201@sjtu.edu.cn (Y.L.); xjzhan@sjtu.edu.cn (X.Z.); ytl@sjtu.edu.cn (Y.L.); zhdsjtu@sjtu.edu.cn (D.Z.)

<sup>2</sup> Key Laboratory of Urban Agriculture, Ministry of Agriculture and Rural Affairs of the People's Republic of China, Shanghai Jiao Tong University, Shanghai 200240, China

\* Correspondence: zhoupei@sjtu.edu.cn; Tel.: 86-02134205762

Received: 26 November 2020; Accepted: 18 December 2020; Published: date

## S1 Synthesis of ZIF8 and ZIF67

For the synthesis of ZIF-8, two solutions were first prepared by dissolving 0.894 g of Zn(NO<sub>3</sub>)<sub>2</sub>·6H<sub>2</sub>O in 30 mL of methanol and 0.984 g of 2-methylimidazole (2-MeIm) in 30 mL of methanol, respectively. Then, the solution of 2-MeIm was quickly poured into the solution of Zn(NO<sub>3</sub>)<sub>2</sub>·6H<sub>2</sub>O, and the mixture solution was stirred for 24 h at room temperature. Lastly, the solution was centrifuged-washed five times with methanol and dried under vacuum at 60 °C for 12 h. ZIF-67 was synthesized with the same procedure of ZIF-8 except for the use of 0.873 g Co(NO<sub>3</sub>)<sub>2</sub>·6H<sub>2</sub>O as metal precursor.

## S2 Synthesis of ZIF8@ZIF67 and CZIFs Material

In a typical run, 100 mg of ZIF-8 polyhedrons as the seeds were dispersed in 30 mL of methanol. Then 10 mL, 32.8 mg·mL<sup>−1</sup> methanol solution and 150 mg of Co(NO<sub>3</sub>)<sub>2</sub>·6H<sub>2</sub>O were added into the suspension of ZIF-8 polyhedrons under magnetic stirring with 300 rpm. After stirring for 24 h, the ZIF-8@ZIF-67 core-shell particle was centrifuged-washed five times at 8000 rpm with methanol and dried under vacuum at 60 °C for 12 h. The as-prepared ZIF-8@ZIF-67 particles were annealed at 800 °C for 5 h under an argon gas flow with a heating rate of 10 °C/min, and the yielding black powder was moved to a 50 mL centrifuge tube and then added 10 mL 0.5 M H<sub>2</sub>SO<sub>4</sub> solution with a water bath at 80 °C for 12 h to remove the unstable metal species. The black powder was centrifuged with 8000 rpm and washed three times by ultrapure water and then dried under vacuum at 60 °C for 6 h.

## S3 SEM Images of ZIF-8 and ZIF-67

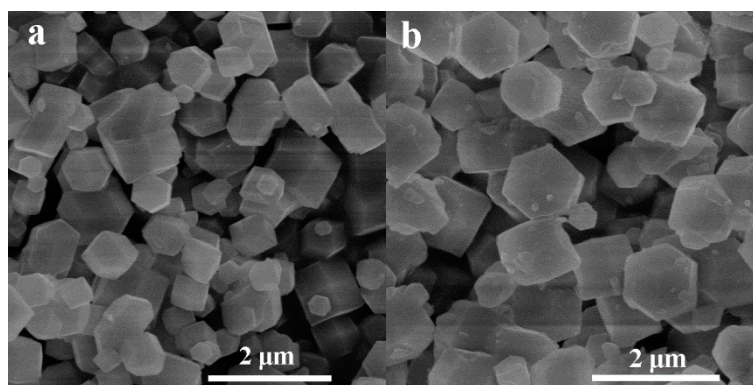

Figure S1. SEM images of (a) ZIF-8 and (b) ZIF-67.

## S4 Optimization of Experimental Conditions

As illustrated in Figure S4a, with the increase of the concentration of CZIFs from 0.25 to 1.0 mg·mL<sup>-1</sup>, the  $\Delta I$  reached the maximum at 0.5 mg·mL<sup>-1</sup>, indicating that 0.5 mg·mL<sup>-1</sup> of CZIFs was sufficient for the reaction. Therefore, 0.5 mg·mL<sup>-1</sup> was selected as the suitable concentration of CZIFs material. The different concentrations of aptamer was optimized and the  $\Delta I$  got the maximum value at 0.5  $\mu$ M (Figure S4b). Therefore, 5  $\mu$ M was selected as the suitable aptamer concentration. As shown in Figure S4c, the pH of buffer solution was optimized. With the increased the concentration of pH, the  $\Delta I$  reached the maximum at 5.5, indicating that pH 5.5 was the most suitable in the below experiments. As shown in Figure S4d, above 40 mins, the  $\Delta I$  signal almost kept invariable, suggesting that 40 mins was suitable as the incubating time of aptasensor and Pb<sup>2+</sup>. Hence, the incubating 40 mins was adopted in the following work.

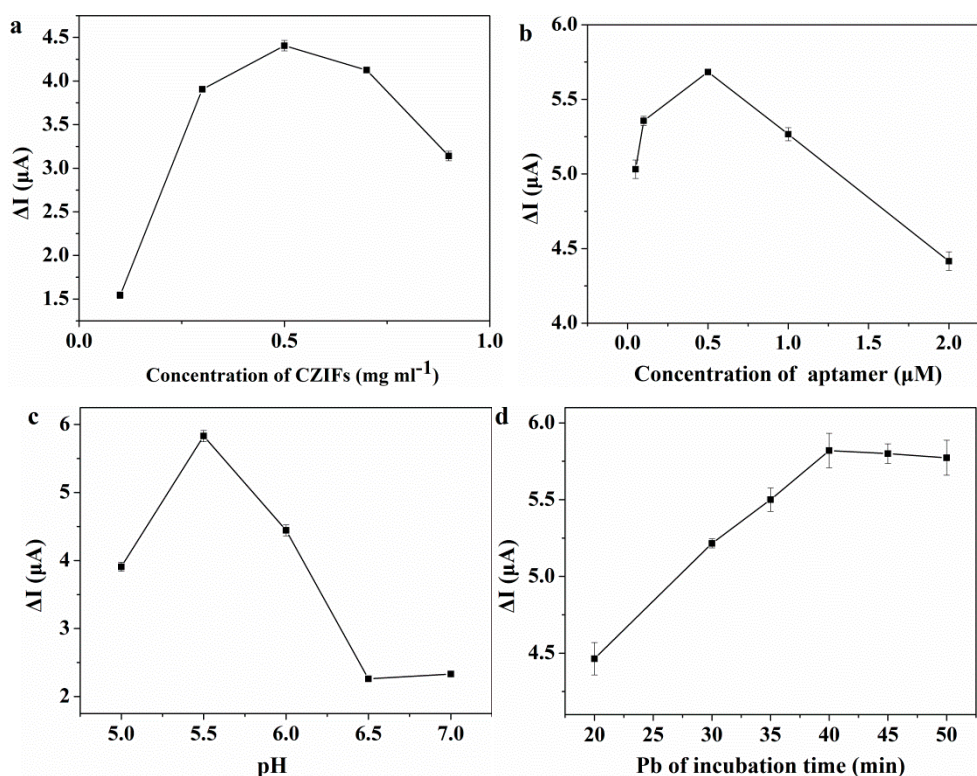

Figure S2. Optimization of the experimental parameters: (a) concentration of porous carbon, (b) concentration of aptamer, (c) pH of buffer solution, (d) different incubation time on aptasensor with Pb<sup>2+</sup>.

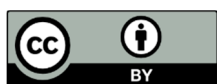

© 2020 by the authors. Licensee MDPI, Basel, Switzerland. This article is an open access article distributed under the terms and conditions of the Creative Commons Attribution (CC BY) license (<http://creativecommons.org/licenses/by/4.0/>).
